# Supplementary material for: Similar freezing spectra of particles in plant canopies and in the air at a high-altitude site
Source: Copernicus journal article supplement (doi:10.5194/bg-21-5219-2024), 2024-11-25
Supplement: Supplementary file 1 [file bg-21-5219-2024-supplement.pdf]

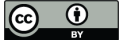

*Supplement of*

## **Similar freezing spectra of particles in plant canopies and in the air at a high-altitude site**

**Annika Einbock and Franz Conen**

*Correspondence to:* Annika Einbock ([annika.einbock@unibas.ch](mailto:annika.einbock@unibas.ch))

The copyright of individual parts of the supplement might differ from the article licence.

Table S1: Data acquired from trees sampled in Gempen (FS: *F. sylvatica*, JR: *J. regia*, PA: *P. avium*, TP: *T. platyphyllos*): leaf colour as NCS code, differential INP concentration  $k(T)$ , spectral type (mon: monotonous increase, brackets for spectra with insignificant peaks), leaf mass per area (LMA). Duplicate measurements of leaf C and N displayed in separate rows.

| dd/mm/yyyy | no  | tree ID   | NCS code  | $k(T)$ ( $\text{cm}^{-2} \text{K}^{-1}$ ) |      |      |      |      |       |       |       | INP <sub>10</sub> ( $\text{cm}^{-2}$ ) | spectral type | LMA ( $\text{g m}^{-2}$ ) | $\delta^{13}\text{C}$ (‰) | N (mg (g dry weight) <sup>-1</sup> ) | C:N atomic ratio |
|------------|-----|-----------|-----------|-------------------------------------------|------|------|------|------|-------|-------|-------|----------------------------------------|---------------|---------------------------|---------------------------|--------------------------------------|------------------|
|            |     |           |           | -2.5                                      | -3.5 | -4.5 | -5.5 | -6.5 | -7.5  | -8.5  | -9.5  |                                        |               |                           |                           |                                      |                  |
| 09/08/2023 | 1   | FS1       | 4050 G40Y | 0.00                                      | 0.00 | 0.00 | 0.27 | 0.54 | 1.22  | 2.13  | 3.51  | 7.7                                    | mon           | 84.6                      | -30.7                     | 29.1                                 | 19.4             |
|            | 2   | FS2       | 3050 G30Y | 0.00                                      | 0.00 | 0.00 | 0.98 | 2.00 | 6.28  | 10.32 | 16.79 | 36.4                                   | mon           | 36.5                      | -31.9                     | 19.2                                 | 28.6             |
|            | 3   | JR1       | 3050 G30Y | 0.00                                      | 0.00 | 0.00 | 0.00 | 7.97 | 5.23  | 3.78  | 2.13  | 19.1                                   | >-7.5         | 31.4                      | -33.4                     | 33.1                                 | 14.1             |
|            | 4   | JR2       | 5030 G30Y | 0.00                                      | 0.00 | 0.00 | 0.04 | 0.29 | 0.21  | 0.55  | 2.39  | 3.5                                    | (>-7.5)       | 74.9                      | -29.8                     | 38.5                                 | 14.2             |
|            | 5   | PA1       | 3050 G30Y | 0.00                                      | 0.00 | 0.00 | 0.03 | 0.33 | 0.65  | 1.43  | 1.60  | 4.0                                    | mon           | 75.7                      | -29.3                     | 24.8                                 | 22.4             |
|            | 6   | PA2       | 4050 G40Y | 0.00                                      | 0.00 | 0.00 | 0.02 | 0.09 | 0.30  | 0.64  | 0.71  | 1.8                                    | mon           | 89.2                      | -29.1                     | 19.6                                 | 28.0             |
|            | 6   | PA2       |           |                                           |      |      |      |      |       |       |       |                                        |               |                           | -29.3                     | 20.2                                 | 27.3             |
|            | 7   | TP1       | 4050 G40Y | 0.00                                      | 0.00 | 0.00 | 0.04 | 0.05 | 0.11  | 0.30  | 0.22  | 0.7                                    | (-8.5)        | 49.4                      | -28.5                     | 36.4                                 | 15.1             |
| 8          | TP2 | 4050 G40Y | 0.00      | 0.00                                      | 0.02 | 0.03 | 0.13 | 0.36 | 0.42  | 0.76  | 1.7   | mon                                    | 49.7          | -28.5                     | 33.9                      | 16.3                                 |                  |
| 22/08/2023 | 9   | FS1       | 3560 G30Y | 0.00                                      | 0.00 | 0.02 | 0.06 | 2.04 | 3.74  | 4.49  | 5.32  | 15.7                                   | mon           | 79.0                      | -30.7                     | 21.0                                 | 27.1             |
|            | 10  | FS2       | 3560 G30Y | 0.00                                      | 0.00 | 0.06 | 0.15 | 1.60 | 3.82  | 11.81 | 18.42 | 35.9                                   | mon           | 30.0                      | -33.6                     | 26.8                                 | 20.8             |
|            | 11  | JR1       | 6030 G30Y | 0.00                                      | 0.00 | 0.00 | 0.09 | 1.43 | 2.37  | 2.33  | 3.05  | 9.3                                    | -7.5          | 31.7                      | -33.8                     | 35.4                                 | 14.3             |
|            | 12  | JR2       | 5030 G30Y | 0.00                                      | 0.00 | 0.00 | 0.03 | 0.31 | 0.69  | 0.88  | 2.05  | 4.0                                    | mon           | 47.7                      | -32.2                     | 33.3                                 | 16.8             |
|            | 13  | PA1       | 5040 G40Y | 0.00                                      | 0.00 | 0.00 | 0.41 | 2.49 | 1.29  | 0.00  | 0.51  | 4.7                                    | >-7.5         | 71.5                      | -29.6                     | 22.0                                 | 24.8             |
|            | 14  | PA2       | 4550 G40Y | 0.00                                      | 0.00 | 0.00 | 0.02 | 0.11 | 0.65  | 1.20  | 0.70  | 2.7                                    | -8.5          | 73.4                      | -29.5                     | 21.8                                 | 25.9             |
|            | 15  | TP1       | 4550 G40Y | 0.00                                      | 0.00 | 0.00 | 0.00 | 0.08 | 0.40  | 0.68  | 0.31  | 1.5                                    | -8.5          | 46.9                      | -28.1                     | 32.5                                 | 17.0             |
|            | 16  | TP2       | 4050 G40Y | 0.00                                      | 0.00 | 0.00 | 0.46 | 2.75 | 4.98  | 13.74 | 3.68  | 25.6                                   | -8.5          | 33.2                      | -29.9                     | 27.9                                 | 18.2             |
| 16         | TP2 |           |           |                                           |      |      |      |      |       |       |       |                                        |               | -30.2                     | 30.4                      | 16.9                                 |                  |
| 12/09/2023 | 17  | FS1       | 4550 G50Y | 0.00                                      | 0.00 | 0.00 | 0.04 | 0.16 | 1.07  | 1.83  | 4.90  | 8.0                                    | mon           | 82.2                      | -29.7                     | 24.7                                 | 23.1             |
|            | 18  | FS2       | 4050 G40Y | 0.00                                      | 0.00 | 0.04 | 0.82 | 2.59 | 22.70 | 18.84 | 25.28 | 70.3                                   | -7.5          | 29.7                      | -34.0                     | 23.2                                 | 23.5             |
|            | 19  | JR1       | 4550 G30Y | 0.02                                      | 0.03 | 0.09 | 0.34 | 1.20 | 1.97  | 4.15  | 7.47  | 15.3                                   | mon           | 26.8                      | -34.2                     | 33.1                                 | 14.9             |
|            | 19  | JR1       |           |                                           |      |      |      |      |       |       |       |                                        |               |                           | -34.2                     | 33.3                                 | 14.7             |
|            | 20  | JR2       | 5540 G30Y | 0.00                                      | 0.00 | 0.10 | 0.02 | 0.21 | 1.33  | 1.69  | 4.80  | 8.2                                    | >-7.5         | 53.7                      | -30.0                     | 27.8                                 | 18.7             |
|            | 21  | PA1       | 5450 G30Y | 0.00                                      | 0.00 | 0.00 | 0.12 | 0.28 | 0.49  | 3.06  | 6.84  | 10.8                                   | mon           | 69.7                      | -29.8                     | 20.2                                 | 27.0             |
|            | 22  | PA2       | 4050 G40Y | 0.00                                      | 0.00 | 0.00 | 0.12 | 0.18 | 0.55  | 0.55  | 1.76  | 3.1                                    | (-7.5)        | 85.1                      | -29.3                     | 15.1                                 | 38.3             |
|            | 23  | TP1       | 5540 G40Y | 0.00                                      | 0.00 | 0.00 | 0.02 | 0.37 | 0.90  | 0.81  | 1.42  | 3.5                                    | (-7.5)        | 48.0                      | -29.2                     | 31.1                                 | 17.1             |
| 24         | TP2 | 4050 G40Y | 0.00      | 0.00                                      | 0.02 | 0.47 | 2.14 | 7.91 | 2.29  | 9.02  | 21.8  | -7.5                                   | 40.5          | -30.3                     | 28.8                      | 17.8                                 |                  |
| 26/09/2023 | 25  | FS1       | 6030 G70Y | 0.00                                      | 0.00 | 0.04 | 0.10 | 2.68 | 2.80  | 20.52 | 69.09 | 95.2                                   | mon           | 65.1                      | -30.2                     | 21.0                                 | 26.0             |
|            | 25  | FS1       |           |                                           |      |      |      |      |       |       |       |                                        |               |                           | -29.9                     | 20.2                                 | 26.7             |
|            | 26  | FS2       | 5040 G40Y | 0.00                                      | 0.00 | 0.02 | 0.66 | 4.71 | 7.56  | 32.68 | 61.09 | 106.6                                  | mon           | 40.3                      | -33.8                     | 22.6                                 | 24.1             |
|            | 27  | JR1       | 5040 G30Y | 0.09                                      | 1.34 | 2.24 | 0.92 | 0.97 | 9.65  | 22.59 | 34.77 | 72.6                                   | >-7.5         | 62.0                      | -31.0                     | 30.0                                 | 18.4             |
|            | 28  | JR2       | 5040 G30Y | 0.00                                      | 0.00 | 0.02 | 0.71 | 2.61 | 1.88  | 2.26  | 4.89  | 12.4                                   | >-7.5         | 28.6                      | -33.8                     | 31.7                                 | 15.9             |
|            | 29  | PA1       | 5040 G40Y | 0.00                                      | 0.07 | 0.13 | 0.14 | 0.67 | 2.19  | 2.24  | 3.12  | 8.6                                    | mon           | 66.5                      | -30.4                     | 22.5                                 | 23.8             |
|            | 30  | PA2       | 0560 Y    | 0.00                                      | 0.00 | 0.02 | 0.04 | 0.26 | 1.96  | 2.66  | 3.46  | 8.4                                    | mon           | 76.3                      | -30.8                     | 10.0                                 | 55.3             |
|            | 31  | TP1       | 5040 G50Y | 0.00                                      | 0.00 | 0.00 | 0.00 | 0.08 | 0.10  | 0.35  | 0.47  | 1.0                                    | mon           | 54.5                      | -28.3                     | 24.7                                 | 22.7             |
| 32         | TP2 | 5040 G40Y | 0.00      | 0.00                                      | 0.03 | 0.71 | 1.71 | 3.85 | 3.48  | 10.05 | 19.8  | (-7.5)                                 | 40.0          | -30.1                     | 26.6                      | 19.6                                 |                  |
| 03/10/2023 | 33  | FS1       | 6030 G90Y | 0.00                                      | 0.00 | 0.00 | 0.05 | 1.08 | 7.99  | 6.22  | 13.37 | 28.7                                   | -7.5          | 72.7                      | -29.8                     | 20.1                                 | 27.2             |
|            | 34  | FS2       | 3050 Y20R | 0.00                                      | 0.00 | 0.35 | 5.98 | 6.55 | 9.31  | 13.71 | 36.78 | 72.7                                   | mon           | 24.3                      | -34.7                     | 8.7                                  | 61.5             |
|            | 35  | JR1       | 5040 G40Y | 0.00                                      | 0.06 | 0.06 | 1.12 | 5.12 | 8.19  | 6.66  | 12.48 | 33.7                                   | -7.5          | 31.7                      | -34.3                     | 30.9                                 | 16.5             |
|            | 36  | JR2       | 2060 Y10R | 0.02                                      | 0.10 | 0.36 | 0.35 | 0.53 | 1.91  | 8.26  | 39.60 | 51.1                                   | (>-7.5)       | 44.4                      | -31.6                     | 10.0                                 | 53.2             |
|            | 37  | PA1       | 4050 G40Y | 0.02                                      | 1.03 | 1.32 | 1.41 | 1.82 | 4.10  | 10.33 | 8.49  | 28.5                                   | -8.5          | 80.2                      | -29.9                     | 17.6                                 | 30.8             |
|            | 38  | PA2       | 1050 Y80R | 0.00                                      | 0.00 | 0.04 | 0.15 | 0.75 | 1.81  | 2.48  | 3.67  | 8.9                                    | mon           | 73.4                      | -28.9                     | 9.7                                  | 57.8             |

|            |     |           |           |       |       |       |       |       |       |       |       |       |         |       |       |      |      |
|------------|-----|-----------|-----------|-------|-------|-------|-------|-------|-------|-------|-------|-------|---------|-------|-------|------|------|
|            | 39  | TP1       | 4040 G50Y | 0.00  | 0.00  | 0.00  | 0.14  | 2.70  | 3.00  | 2.06  | 2.68  | 10.6  | -7.5    | 52.7  | -28.9 | 21.6 | 25.3 |
|            | 40  | TP2       | 2060 G90Y | 0.00  | 0.08  | 0.12  | 3.67  | 3.86  | 3.52  | 3.27  | 4.01  | 18.5  | (>-7.5) | 35.1  | -29.5 | 12.2 | 42.3 |
| 17/10/2023 | 41  | FS1       | 5040 G50Y | 0.00  | 0.00  | 0.02  | 0.02  | 0.23  | 1.28  | 2.85  | 5.64  | 10.0  | mon     | 92.1  | -30.4 | 15.4 | 31.4 |
|            | 42  | FS2       | 4050 G40Y | 0.00  | 0.00  | 0.06  | 3.01  | 6.25  | 10.37 | 11.27 | 17.47 | 48.4  | mon     | 31.7  | -34.0 | 20.7 | 25.9 |
|            | 43  | JR1       | 4550 G30Y | 0.00  | 0.00  | 0.00  | 0.13  | 0.73  | 2.74  | 4.26  | 6.02  | 13.9  | mon     | 24.4  | -34.6 | 26.1 | 18.9 |
|            | 44  | JR2       | 5020 Y30R | 0.00  | 0.07  | 0.13  | 0.10  | 0.33  | 2.97  | 13.65 | 11.02 | 28.3  | -8.5    | 53.7  | -30.9 | 9.7  | 57.2 |
|            | 45  | PA1       | 4050 G40Y | 0.00  | 0.00  | 0.00  | 0.09  | 1.20  | 7.59  | 10.68 | 9.74  | 29.3  | -8.5    | 81.9  | -30.6 | 19.6 | 27.2 |
|            | 46  | PA2       | 1060 Y10R | 0.00  | 0.00  | 0.12  | 0.31  | 0.86  | 3.43  | 5.67  | 4.72  | 15.1  | (-8.5)  | 74.5  | -29.9 | 9.9  | 56.1 |
|            | 46  | PA2       |           |       |       |       |       |       |       |       |       |       |         |       | -29.3 | 11.0 | 51.4 |
|            | 47  | TP1       | 4040 Y30R | 0.00  | 0.00  | 0.00  | 0.01  | 0.23  | 0.86  | 1.75  | 2.20  | 5.1   | mon     | 40.4  | -28.3 | 10.8 | 49.3 |
| 48         | TP2 | 2050 Y10R | 0.00      | 0.00  | 0.00  | 0.59  | 2.71  | 10.45 | 6.22  | 6.06  | 26.0  | -7.5  | 38.9    | -29.6 | 9.2   | 56.8 |      |
| 30/10/2023 | 49  | FS1       | 1070 Y10R | 0.00  | 0.00  | 0.07  | 0.15  | 0.52  | 3.05  | 6.00  | 36.43 | 46.2  | mon     | 85.2  | -31.5 | 11.1 | 50.9 |
|            | 50  | FS2       | 4050 Y40R | 0.00  | 0.02  | 0.51  | 2.36  | 3.05  | 14.79 | 23.12 | 32.01 | 75.9  | mon     | 28.6  | -34.6 | 7.1  | 74.4 |
|            | 51  | JR1       | 1060 Y    | 0.00  | 0.00  | 0.04  | 0.12  | 0.50  | 1.21  | 2.53  | 5.21  | 9.6   | mon     | 20.7  | -34.4 | 10.2 | 47.2 |
|            | 52  | JR2       | 5030 Y20R | 0.03  | 1.77  | 1.84  | 2.05  | 1.70  | 8.74  | 29.52 | 41.16 | 86.8  | (>-7.5) | 53.4  | -30.3 | 9.9  | 55.1 |
|            | 52  | JR2       |           |       |       |       |       |       |       |       |       |       |         |       | -30.0 | 9.6  | 56.8 |
|            | 53  | PA1       | 0570 Y10R | 0.00  | 0.02  | 1.01  | 4.29  | 9.32  | 9.71  | 9.68  | 13.40 | 47.4  | (-7.5)  | 78.5  | -30.6 | 12.0 | 44.7 |
|            | 54  | PA2       | 1040 Y60R | 0.00  | 0.17  | 0.25  | 0.27  | 1.19  | 6.26  | 22.21 | 19.70 | 50.1  | -8.5    | 78.0  | -28.6 | 9.3  | 60.0 |
|            | 55  | TP1       | 3040 Y30R | 0.00  | 0.12  | 0.10  | 0.15  | 0.67  | 1.46  | 3.07  | 1.43  | 7.0   | -8.5    | 46.8  | -29.0 | 10.8 | 49.9 |
| 56         | TP2 | 2040 Y    | 0.00      | 0.00  | 0.30  | 2.88  | 4.94  | 6.00  | 2.98  | 4.81  | 21.9  | -7.5  | 36.0    | -30.6 | 13.5  | 39.0 |      |
| 15/11/2023 | 57  | FS1       | 6030 Y50R | 0.00  | 0.00  | 0.02  | 0.02  | 0.16  | 1.00  | 2.37  | 7.59  | 11.1  | mon     | 57.6  | -31.6 | 9.5  | 59.9 |
|            | 58  | FS2       | 5040 Y50R | 0.00  | 0.02  | 0.33  | 2.67  | 4.58  | 7.73  | 10.80 | 16.22 | 42.3  | mon     | 34.6  | -34.3 | 7.4  | 73.4 |
|            | 58  | FS2       |           |       |       |       |       |       |       |       |       |       |         |       | -34.0 | 6.6  | 81.6 |
|            | 59  | JR1       | 2060 Y10R | 0.01  | 0.28  | 0.60  | 0.39  | 0.66  | 1.74  | 5.33  | 2.47  | 11.5  | >-7.5   | 27.2  | -34.5 | 12.5 | 39.0 |
|            | 60  | JR2       | 5030 Y20R | 0.73  | 7.46  | 6.47  | 10.87 | 7.15  | 10.53 | 60.51 | 62.49 | 166.2 | (>-7.5) | 50.8  | -32.1 | 11.2 | 48.7 |
|            | 61  | PA1       | 1060 Y10R | 0.00  | 0.07  | 0.19  | 0.75  | 2.21  | 8.15  | 11.28 | 11.05 | 33.7  | -8.5    | 64.7  | -30.9 | 9.1  | 59.9 |
|            | 62  | PA2       | 1070 Y10R | 0.00  | 0.00  | 0.10  | 0.14  | 0.97  | 3.32  | 4.44  | 7.20  | 16.2  | mon     | 88.3  | -29.4 | 6.9  | 80.2 |
|            | 63  | TP1       | 2060 G90Y | 13.14 | 82.52 | 48.26 | 24.33 | 16.83 | 30.21 | 97.29 | 60.75 | 373.3 | >-7.5   | 36.1  | -28.9 | 10.6 | 49.8 |
| 64         | TP2 | 3040 G70Y | 0.00      | 0.00  | 0.82  | 7.38  | 15.87 | 39.53 | 9.04  | 30.15 | 102.8 | -7.5  | 35.5    | -31.6 | 16.3  | 32.1 |      |

5

Table S2: Data acquired from one *F. sylvatica* sampled at about 10 m (bottom), 20 m (middle) and 30 m (top) above ground in Hölstein. Leaf colour as NCS code, k(T): differential INP concentration, leaf mass per area (LMA). Duplicate measurements for leaf C and N displayed in separate rows.

| dd/mm/yyyy | level  | compass direction | NCS code  | k(T) (cm <sup>2</sup> K <sup>-1</sup> ) |      |      |       |       |       |       |      |      | INP <sub>-10</sub> (cm <sup>2</sup> ) | LMA (g m <sup>-2</sup> ) | δ <sup>13</sup> C (‰) | N (mg (g dry weight) <sup>-1</sup> ) | C:N atomic ratio |
|------------|--------|-------------------|-----------|-----------------------------------------|------|------|-------|-------|-------|-------|------|------|---------------------------------------|--------------------------|-----------------------|--------------------------------------|------------------|
|            |        |                   |           | -2.5                                    | -3.5 | -4.5 | -5.5  | -6.5  | -7.5  | -8.5  | -9.5 |      |                                       |                          |                       |                                      |                  |
| 05/09/2023 | top    | N                 | 4550 G50Y | 0.00                                    | 0.00 | 0.00 | 0.05  | 0.10  | 0.80  | 0.92  | 1.14 | 3.0  | 97.6                                  | -27.4                    | 15.5                  | 37.0                                 |                  |
|            | top    | S                 | 5540 G40Y | 0.00                                    | 0.00 | 0.00 | 0.03  | 0.08  | 0.36  | 0.47  | 2.25 | 3.2  | 99.0                                  | -27.6                    | 16.8                  | 34.0                                 |                  |
|            | middle | N                 | 5540 G40Y | 0.00                                    | 0.00 | 0.00 | 0.11  | 0.46  | 0.99  | 1.76  | 2.56 | 5.9  | 84.7                                  | -29.2                    | 18.6                  | 30.6                                 |                  |
|            | middle | N                 |           |                                         |      |      |       |       |       |       |      |      |                                       | -28.8                    | 18.1                  | 31.4                                 |                  |
|            | middle | S                 | 5040 G50Y | 0.00                                    | 0.00 | 0.00 | 0.05  | 0.06  | 0.33  | 1.33  | 2.53 | 4.3  | 91.5                                  | -28.5                    | 20.2                  | 28.6                                 |                  |
|            | bottom | SE                | 5040 G40Y | 0.00                                    | 0.00 | 0.24 | 11.68 | 20.47 | 19.55 | 17.58 | 3.56 | 73.1 | 73.5                                  | -28.7                    | 19.2                  | 29.8                                 |                  |

|            |        |    |           |      |      |      |      |      |      |      |      |      |      |       |      |      |
|------------|--------|----|-----------|------|------|------|------|------|------|------|------|------|------|-------|------|------|
| 11/10/2023 | bottom | N  | 5030 G30Y | 0.00 | 0.00 | 0.00 | 0.10 | 0.50 | 0.97 | 2.39 | 3.81 | 7.8  | 47.8 | -30.4 | 20.5 | 27.2 |
|            | top    | N  | 1070 Y10R | 0.00 | 0.00 | 0.02 | 0.06 | 0.10 | 1.00 | 1.90 | 1.64 | 4.7  | 84.5 | -28.1 | 9.0  | 64.0 |
|            | top    | S  | 1070 Y10R | 0.00 | 0.00 | 0.02 | 0.02 | 0.24 | 1.13 | 1.81 | 3.83 | 7.1  | 97.8 | -28.0 | 9.9  | 58.5 |
|            | middle | N  | 2070 Y10R | 0.00 | 0.00 | 0.00 | 0.02 | 0.18 | 0.99 | 1.91 | 3.64 | 6.7  | 82.0 | -28.9 | 9.5  | 60.3 |
|            | middle | S  | 1070 Y10R | 0.00 | 0.00 | 0.00 | 0.04 | 0.24 | 0.90 | 2.02 | 2.56 | 5.8  | 84.0 | -28.8 | 9.4  | 61.0 |
|            | bottom | N  | 3050 G80Y | 0.00 | 0.00 | 0.00 | 0.10 | 0.34 | 1.40 | 3.79 | 1.57 | 7.2  | 79.1 | -29.4 | 10.6 | 54.9 |
|            | bottom | SE | 4050 G60Y | 0.00 | 0.00 | 0.02 | 0.18 | 1.52 | 4.27 | 4.20 | 5.64 | 15.8 | 80.1 | -28.7 | 17.4 | 32.2 |
|            |        |    |           |      |      |      |      |      |      |      |      |      |      | -28.6 | 18.1 | 32.2 |

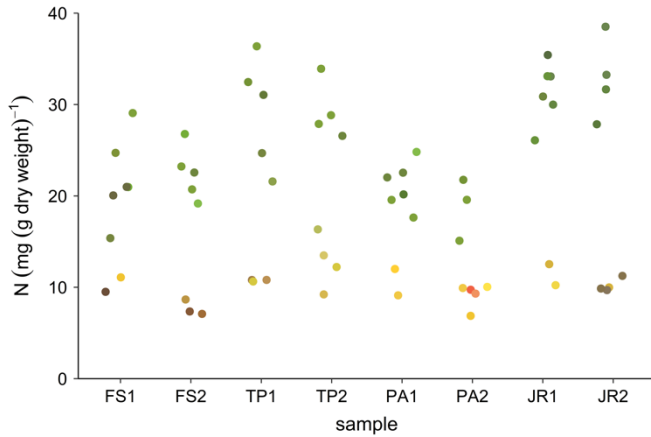

15 **Figure S1:** Nitrogen content of foliage from trees sampled in Gempen (FS: *F. sylvatica*, TP: *T. platyphyllos*, PA: *P. avium*, JR: *J. regia*). Colours display leaf colour.

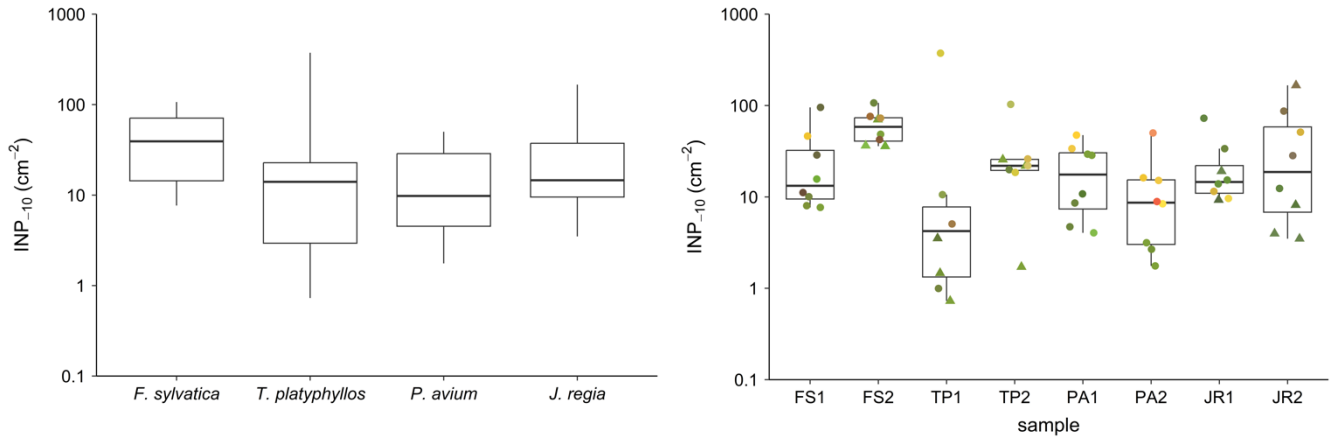

20 **Figure S2:** Cumulative concentration of INPs active at temperatures  $\geq -10$  °C (INP<sub>-10</sub>) quantified in leaf washing water by species (left) and sampled tree (right) for the Gempen sampling site. Colours represent leaf colour, round symbols samples collected from the same tree.

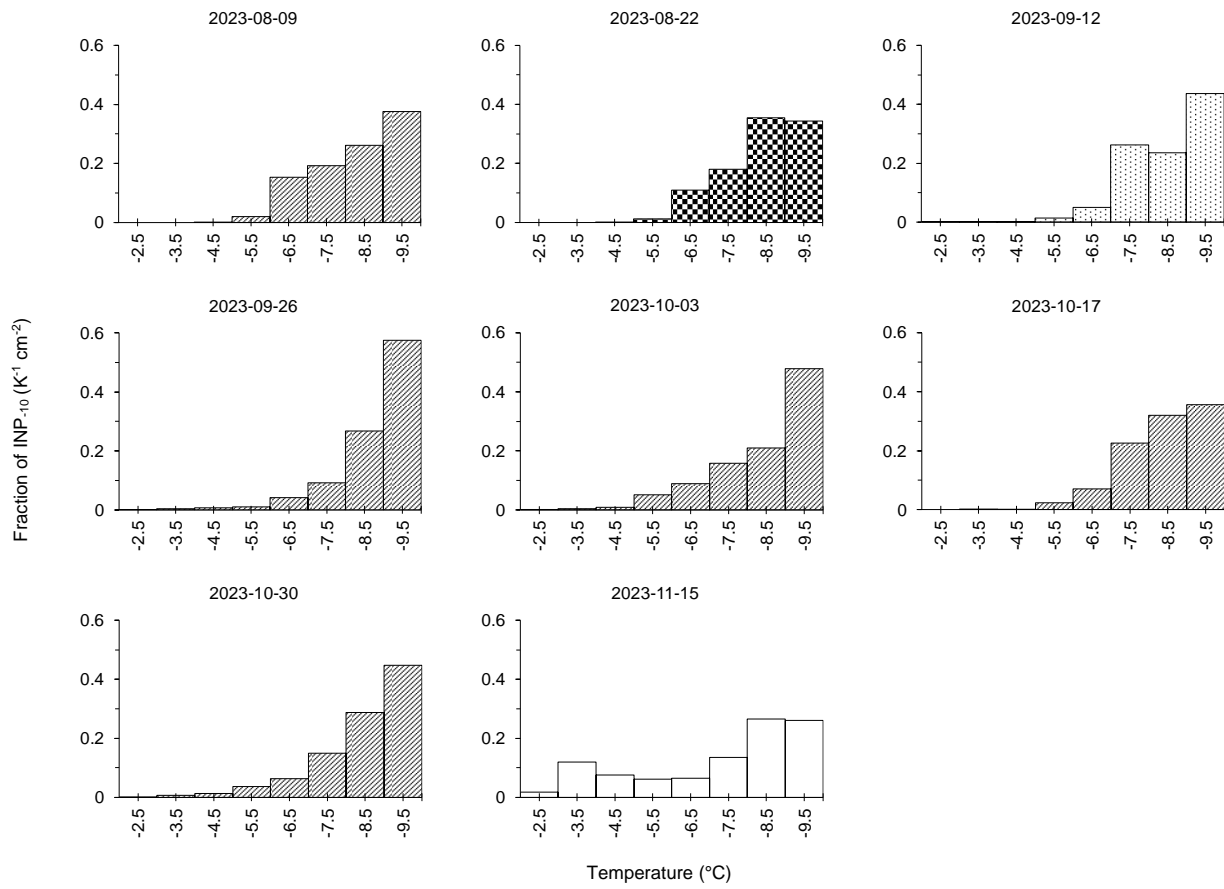

**Figure S3: Mean differential INP concentrations of all trees sampled on a particular day, normalized by total daily cumulative INP-10 concentration.**
